# Supplementary material for: Solvent effects on the NMR shieldings of stacked DNA base pairs
Source: Royal Society of Chemistry journal article supplement (doi:10.1039/d2cp00398h), 2022-01-01
Supplement: d2cp00398h1.pdf [file d2cp00398h1.pdf]

# Solvent effects on NMR shieldings of stacked DNA base pairs

Fernando A. Martínez,<sup>†,‡</sup> Natalia S. Adler,<sup>¶,§</sup> Claudio N. Cavasotto,<sup>||,§,⊥,#</sup> and  
Gustavo A. Aucar<sup>\*,†,@</sup>

<sup>†</sup>*Institute of Modelling and Innovation on Technology (IMIT), CONICET-UNNE*

<sup>‡</sup>*Chemistry Department, Natural and Exact Science Faculty, Northeastern University of  
Argentina, Avda Libertad 5460, W3404AAS Corrientes, Argentina*

<sup>¶</sup>*Computational Drug Design and Biomedical Informatics Laboratory, Instituto de  
Investigaciones en Medicina Translacional (IIMT), CONICET-Universidad Austral, Pilar,  
Buenos Aires, Argentina*

<sup>§</sup>*Centro de Investigaciones en BioNanociencias (CIBION), CONICET, Buenos Aires,  
Argentina*

<sup>||</sup>*Computational Drug Design and Biomedical Informatics Laboratory, Instituto de  
Investigaciones en Medicina Translacional(IIMT), CONICET-Universidad Austral, Pilar,  
Buenos Aires, Argentina*

<sup>⊥</sup>*Facultad de Ciencias Biomédicas and Facultad de Ingeniería, Universidad Austral, Pilar,  
Buenos Aires, Argentina*

<sup>#</sup>*Austral Institute for Applied Artificial Inteligence, Universidad Austral, Pilar, Buenos  
Aires, Argentina*

<sup>@</sup>*Physics Department, Natural and Exact Science Faculty, Northeastern University of  
Argentina, Avda Libertad 5460, W3404AAS Corrientes, Argentina*

E-mail: [gauucar@conicet.gov.ar](mailto:gauucar@conicet.gov.ar)

**Table 1: NMR magnetic shieldings of atoms belonging to the witness pair calculated at B97-D/6-311++G\*\* level of theory. Chemical shifts<sup>a</sup> are given between parenthesis and all values are in ppm**

|                  | Guanine            |                   |                   |                   |                   |                   |                  |                 |                 | Cytosine           |                   |                   |                   |                 |                 |
|------------------|--------------------|-------------------|-------------------|-------------------|-------------------|-------------------|------------------|-----------------|-----------------|--------------------|-------------------|-------------------|-------------------|-----------------|-----------------|
|                  | N <sub>1</sub>     | N <sub>2</sub>    | N <sub>3</sub>    | N <sub>7</sub>    | C <sub>6</sub>    | C <sub>2</sub>    | H <sub>1</sub>   | H <sub>2</sub>  | H' <sub>2</sub> | N <sub>4</sub>     | N <sub>3</sub>    | C <sub>4</sub>    | C <sub>2</sub>    | H <sub>4</sub>  | H' <sub>4</sub> |
| VAC              |                    |                   |                   |                   |                   |                   |                  |                 |                 |                    |                   |                   |                   |                 |                 |
| F1               | 109.35<br>(147.54) | 184.89<br>(71.91) | 87.32<br>(169.48) | 5.52<br>(251.28)  | 31.39<br>(151.11) | 32.29<br>(150.21) | 18.51<br>(13.19) | 22.23<br>(9.47) | 27.37<br>(4.33) | 160.39<br>(96.41)  | 52.29<br>(204.51) | 21.49<br>(161.01) | 27.93<br>(154.57) | 21.50<br>(10.2) | 27.80<br>(3.9)  |
| F3               | 108.53<br>(148.27) | 175.93<br>(80.87) | 86.07<br>(170.73) | 5.03<br>(251.77)  | 30.93<br>(151.57) | 31.16<br>(151.34) | 18.02<br>(13.68) | 22.16<br>(9.54) | 27.24<br>(4.46) | 164.48<br>(92.32)  | 51.22<br>(205.58) | 21.21<br>(161.29) | 28.53<br>(153.97) | 22.15<br>(9.55) | 28.25<br>(3.45) |
| F5               | 108.51<br>(148.29) | 174.16<br>(82.64) | 81.80<br>(175.00) | 6.12<br>(250.68)  | 30.82<br>(151.68) | 31.44<br>(151.06) | 18.21<br>(13.49) | 22.68<br>(9.02) | 27.27<br>(4.43) | 165.81<br>(90.99)  | 51.83<br>(204.97) | 21.55<br>(160.95) | 28.63<br>(153.87) | 22.1<br>(9.60)  | 28.42<br>(3.28) |
| ES               |                    |                   |                   |                   |                   |                   |                  |                 |                 |                    |                   |                   |                   |                 |                 |
| F1               | 109.53<br>(147.27) | 179.80<br>(77.00) | 92.45<br>(164.35) | 21.53<br>(235.27) | 32.40<br>(150.10) | 31.84<br>(150.66) | 18.35<br>(13.35) | 22.31<br>(9.39) | 26.41<br>(5.29) | 151.06<br>(105.74) | 58.44<br>(198.36) | 21.71<br>(160.79) | 28.99<br>(153.51) | 22.09<br>(9.61) | 24.39<br>(7.31) |
| F3               | 109.09<br>(147.71) | 171.10<br>(85.70) | 90.53<br>(166.27) | 21.14<br>(235.66) | 32.67<br>(149.83) | 27.13<br>(155.37) | 18.12<br>(13.58) | 22.89<br>(8.81) | 26.36<br>(5.34) | 154.31<br>(102.49) | 59.24<br>(197.56) | 21.52<br>(160.98) | 29.70<br>(152.80) | 22.50<br>(9.20) | 24.92<br>(6.78) |
| F5               | 109.52<br>(147.28) | 168.66<br>(88.14) | 90.21<br>(166.59) | 21.92<br>(234.88) | 32.21<br>(150.29) | 27.97<br>(154.53) | 18.29<br>(13.41) | 22.74<br>(8.96) | 26.12<br>(5.58) | 156.71<br>(100.09) | 58.49<br>(198.31) | 20.59<br>(161.91) | 29.20<br>(153.30) | 22.60<br>(9.10) | 25.07<br>(6.63) |
| IS               |                    |                   |                   |                   |                   |                   |                  |                 |                 |                    |                   |                   |                   |                 |                 |
| F1               | 108.54<br>(148.26) | 181.48<br>(75.32) |                   |                   | 30.70<br>(151.80) | 31.46<br>(151.04) | 18.01<br>(13.69) | 21.95<br>(9.60) |                 | 163.82<br>(92.98)  | 59.42<br>(197.38) | 20.71<br>(161.79) | 27.04<br>(155.46) | 22.19<br>(9.51) | 27.23<br>(4.47) |
| F3               | 109.13<br>(147.67) | 176.89<br>(79.91) |                   |                   | 30.54<br>(151.96) | 31.33<br>(151.17) | 17.88<br>(13.82) | 22.16<br>(9.54) |                 | 165.87<br>(90.93)  | 54.11<br>(202.69) | 20.80<br>(161.70) | 27.96<br>(154.54) | 22.51<br>(9.19) | 27.82<br>(3.88) |
| F5               | 108.76<br>(148.04) | 175.29<br>(81.51) |                   |                   | 30.50<br>(152.00) | 31.54<br>(150.96) | 18.02<br>(13.68) | 22.66<br>(9.04) |                 | 166.56<br>(90.24)  | 54.35<br>(202.45) | 21.18<br>(161.32) | 28.05<br>(154.65) | 22.50<br>(9.20) | 27.93<br>(3.77) |
| ES + IS          |                    |                   |                   |                   |                   |                   |                  |                 |                 |                    |                   |                   |                   |                 |                 |
| F1               | 108.29<br>(148.51) | 178.09<br>(78.71) |                   |                   | 31.90<br>(150.60) | 31.08<br>(151.42) | 18.19<br>(13.51) | 22.10<br>(9.60) |                 | 156.13<br>(100.67) | 60.41<br>(196.39) | 21.03<br>(161.47) | 28.52<br>(153.98) | 22.47<br>(9.23) | 24.20<br>(7.5)  |
| F3               | 109.50<br>(147.30) | 172.68<br>(84.12) |                   |                   | 32.58<br>(149.92) | 27.38<br>(155.38) | 18.12<br>(13.58) | 22.95<br>(8.75) |                 | 155.86<br>(100.94) | 58.83<br>(197.97) | 21.29<br>(161.21) | 29.54<br>(152.96) | 22.58<br>(9.12) | 24.82<br>(6.88) |
| F5               | 110.09<br>(146.71) | 170.37<br>(86.43) |                   |                   | 32.42<br>(150.08) | 29.12<br>(153.38) | 18.34<br>(13.36) | 22.76<br>(8.94) |                 | 156.77<br>(100.03) | 57.82<br>(198.98) | 20.14<br>(162.36) | 28.99<br>(153.51) | 22.51<br>(9.19) | 24.83<br>(6.87) |
| exp <sup>b</sup> | (147.4)            | (76.1)            | 167               | 238               | (161.4)           | (156.7)           | (12-13.6)        | (8-9)           | (5-6)           | (98.2)             | (196.3)           | (167.8)           | (158.8)           | (8.1-8.8)       | (6-7)           |

<sup>a</sup> TMS was used as the reference for Hydrogen and Carbon atoms ( $\sigma(\text{H})=31.7$  ppm and  $\sigma(\text{C})=182.5$  ppm). For Nitrogen atom, the reference was  $\text{NH}_3$  ( $\sigma(\text{N})=256.8$  ppm) Both references were calculated at the same level of theory used for shieldings. <sup>b</sup> Experimental values of chemical shifts were taken from Ref.<sup>1</sup> for Hydrogen atoms, and from Ref.<sup>2</sup> for Carbon and Nitrogen atoms.

## References

- (1) Wijmenga, S. S.; van Buuren, B. N. M. *Prog. Nucl. Magn. Reson. Spectrosc.* **1998**, *32*, 287–387.
- (2) Abramov, G.; Goldbourn, A. Nucleotide-type chemical shift assignment of the encapsulated 40 kbp dsDNA in intact bacteriophage T7 by MAS solid-state NMR. *Journal of biomolecular NMR* **2014**, *59*, 219–230.

**Table 2: Calculated magnetic shieldings (in ppm) at PBE0/6-311++G\*\* level of theory.**

|     | Guanine        |                |                |                |                |                |                |                |                  | Cytosine       |                |                |                |                |                  |
|-----|----------------|----------------|----------------|----------------|----------------|----------------|----------------|----------------|------------------|----------------|----------------|----------------|----------------|----------------|------------------|
|     | N <sub>1</sub> | N <sub>2</sub> | N <sub>3</sub> | N <sub>7</sub> | C <sub>6</sub> | C <sub>2</sub> | H <sub>1</sub> | H <sub>2</sub> | H <sub>2</sub> ' | N <sub>4</sub> | N <sub>3</sub> | C <sub>4</sub> | C <sub>2</sub> | H <sub>4</sub> | H <sub>4</sub> ' |
| VAC |                |                |                |                |                |                |                |                |                  |                |                |                |                |                |                  |
| F1  | 110.62         | 188.81         | 88.29          | -4.13          | 28.32          | 29.15          | 18.14          | 22.01          | 27.07            | 163.38         | 52.9           | 17.72          | 25.03          | 21.34          | 27.58            |
| F3  | 110.23         | 179.88         | 87.09          | -4.56          | 27.92          | 28.18          | 17.63          | 21.99          | 26.92            | 167.48         | 51.78          | 17.56          | 25.47          | 21.92          | 28.03            |
| F5  | 110.32         | 178.03         | 82.79          | -3.43          | 28.01          | 28.07          | 18.01          | 22.55          | 27.02            | 168.91         | 53.12          | 17.47          | 25.84          | 21.95          | 28.27            |
| ES  |                |                |                |                |                |                |                |                |                  |                |                |                |                |                |                  |
| F1  | 110.79         | 184.15         | 93.44          | 14.73          | 29.18          | 28.45          | 18.02          | 22.14          | 26.21            | 153.88         | 58.96          | 18.36          | 25.84          | 21.9           | 24.27            |
| F3  | 111.05         | 175.42         | 91.5           | 14.25          | 29.54          | 22.78          | 17.82          | 22.58          | 26.14            | 156.93         | 59.9           | 17.61          | 27.04          | 22.3           | 24.81            |
| F5  | 111.1          | 172.74         | 91.22          | 15.01          | 29.35          | 24.53          | 17.98          | 22.56          | 25.81            | 159.57         | 59.16          | 16.35          | 26.16          | 22.44          | 25.01            |

**Table 3: Calculated chemical shifts (in ppm) at PBE0/6-311++G\*\* level of theory. Experimental values are also included.**

|     | Guanine        |                |                |                |                |                |                |                |                  | Cytosine       |                |                |                |                |                  |
|-----|----------------|----------------|----------------|----------------|----------------|----------------|----------------|----------------|------------------|----------------|----------------|----------------|----------------|----------------|------------------|
|     | N <sub>1</sub> | N <sub>2</sub> | N <sub>3</sub> | N <sub>7</sub> | C <sub>6</sub> | C <sub>2</sub> | H <sub>1</sub> | H <sub>2</sub> | H <sub>2</sub> ' | N <sub>4</sub> | N <sub>3</sub> | C <sub>4</sub> | C <sub>2</sub> | H <sub>4</sub> | H <sub>4</sub> ' |
| VAC |                |                |                |                |                |                |                |                |                  |                |                |                |                |                |                  |
| F1  | 146.18         | 67.99          | 168.51         | 260.93         | 154.18         | 153.35         | 13.56          | 9.69           | 4.63             | 93.42          | 203.9          | 164.78         | 157.47         | 10.36          | 4.12             |
| F3  | 146.57         | 76.92          | 169.71         | 261.36         | 154.58         | 154.32         | 14.07          | 9.71           | 4.78             | 89.32          | 205.02         | 164.94         | 157.03         | 9.78           | 3.67             |
| F5  | 146.48         | 78.77          | 174.01         | 260.23         | 154.49         | 154.03         | 13.69          | 9.15           | 4.68             | 87.89          | 203.68         | 165.03         | 156.66         | 9.75           | 3.43             |
| ES  |                |                |                |                |                |                |                |                |                  |                |                |                |                |                |                  |
| F1  | 146.01         | 72.65          | 163.36         | 242.07         | 153.32         | 154.05         | 13.68          | 9.56           | 5.49             | 102.92         | 197.84         | 164.14         | 156.66         | 10.51          | 7.43             |
| F3  | 145.75         | 81.38          | 165.3          | 242.55         | 152.96         | 159.72         | 13.88          | 9.12           | 5.56             | 99.87          | 196.9          | 164.89         | 155.46         | 9.4            | 6.89             |
| F5  | 145.7          | 84.06          | 165.58         | 241.79         | 153.15         | 157.97         | 13.72          | 9.14           | 5.89             | 97.23          | 197.64         | 166.15         | 156.34         | 9.26           | 6.69             |
| EXP | 147.4          | 76.1           | 167            | 238            | 161.4          | 156.7          | 12-13.6        | 8-9            | 5-6              | 98.2           | 196.3          | 167.8          | 158.8          | 8.1-8.8        | 6.7-7            |
